# Supplementary material for: Ultra-fast framework stabilization of Ge-rich zeolites by low-temperature plasma treatment
Source: Royal Society of Chemistry journal article supplement (doi:10.1039/c3sc51892b), 2013-10-16
Supplement: c3sc51892b.pdf [file c3sc51892b.pdf]

## Chemical Science

### Supplementary information for

# Ultra-fast Framework Stabilization of Ge-Rich Zeolites by Low-Temperature Plasma Treatment

Mohamad El-Roz,<sup>†</sup> Louwanda Lakiss,<sup>†</sup> Aurelie Vicente,<sup>†</sup> Krassimir Bozhilov,<sup>‡</sup> Frederic Thibault-Starzyk<sup>†</sup> and Valentin Valtchev<sup>†\*</sup>; E-mail: valentin.valtchev@ensicaen.fr

<sup>†</sup>Laboratoire Catalyse et Spectrochimie, ENSICAEN - Université de Caen - CNRS, 6 bd du Maréchal Juin, 14050 Caen, France.

<sup>‡</sup> Central Facility for Advanced Microscopy and Microanalysis, University of California, Riverside, CA 92521, USA

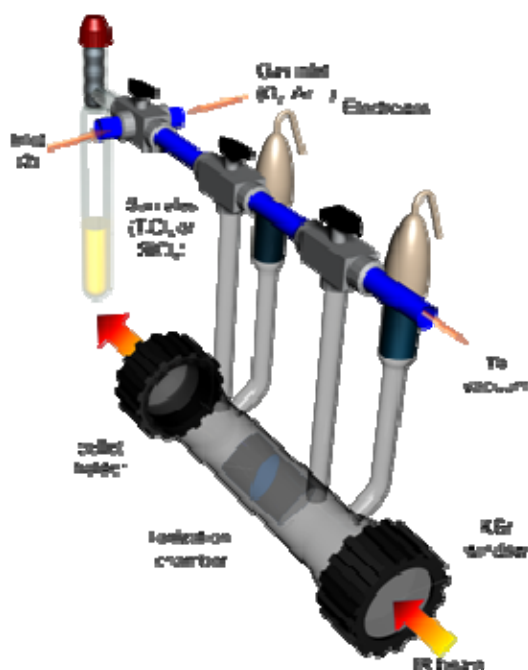

Figure S1. Plasma reactor coupled to IR in situ cell.

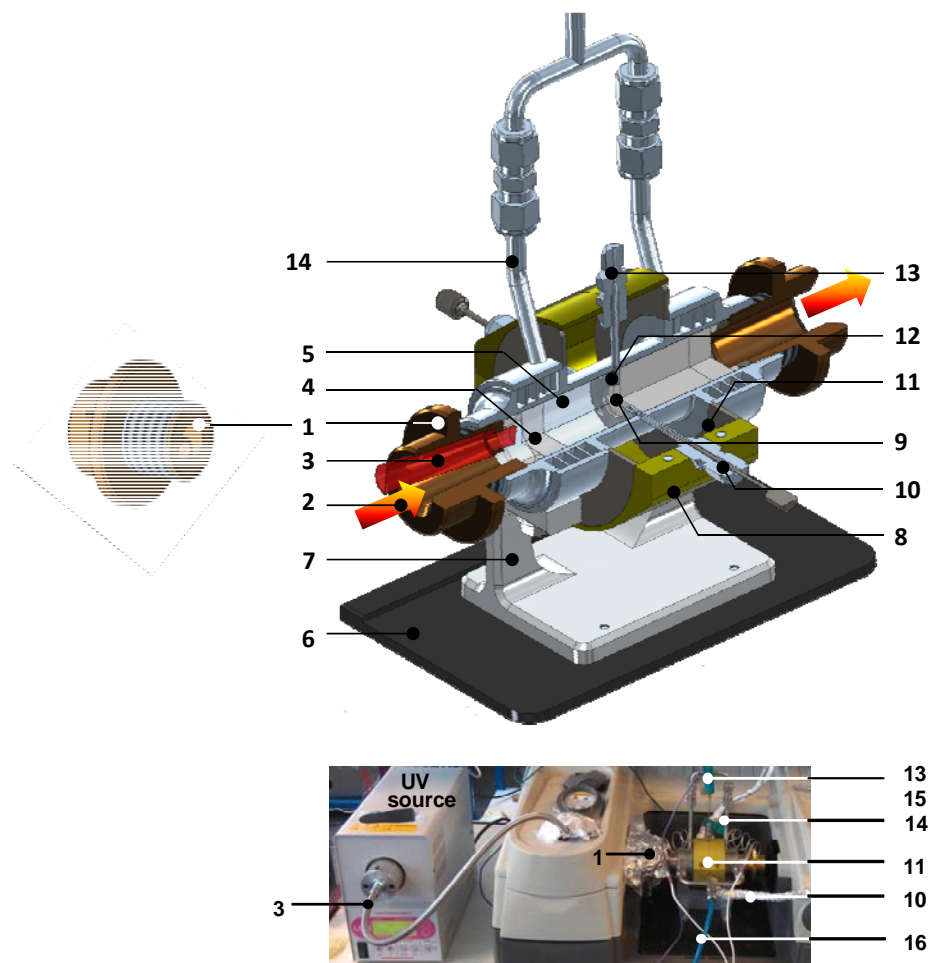

Figure S2. The “sandwich” reactor-IR cell modified for studying UV photocatalysis: (1) Adjusting nut for air tightness (modified for UV-guid position), (2) IR beam, (3) UV-light guide, (4) Kalrez O-ring, (5) KBr windows, (6) Spectrometer base-plate, (7) IR cell support, (8) Oven location, (9) Sample (wafer), (10) Gas inlet, (11) External shell, (12) Wafer holder, (13) Thermocouple location, (14) Air cooling outlet, (15) Gas outlet, (16) Air cooling inlet.

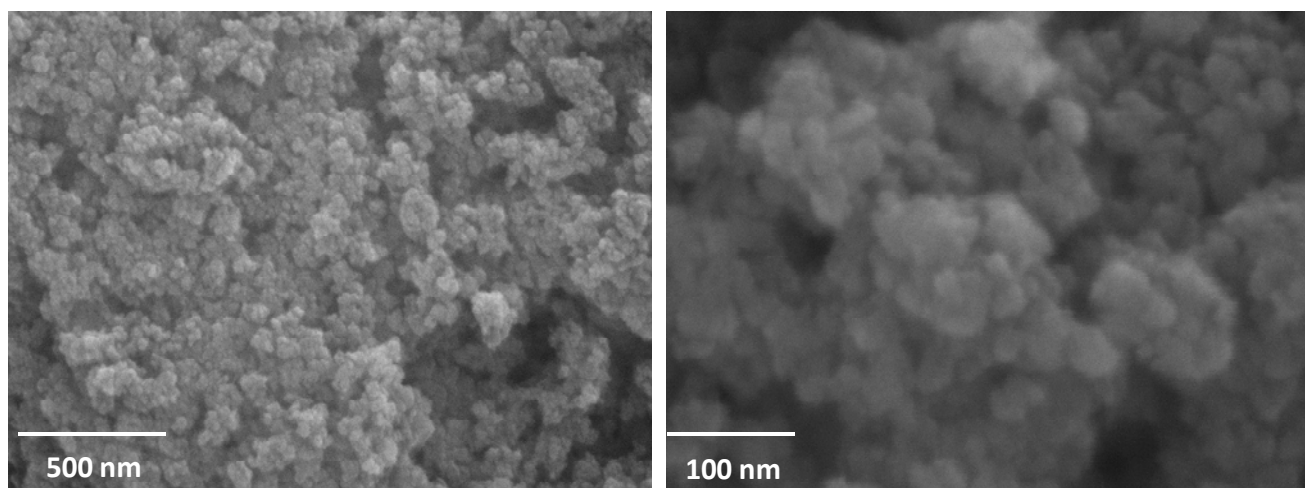

Figure S3. SEM images of Si-BEC (left) and Ti-BEC (right).

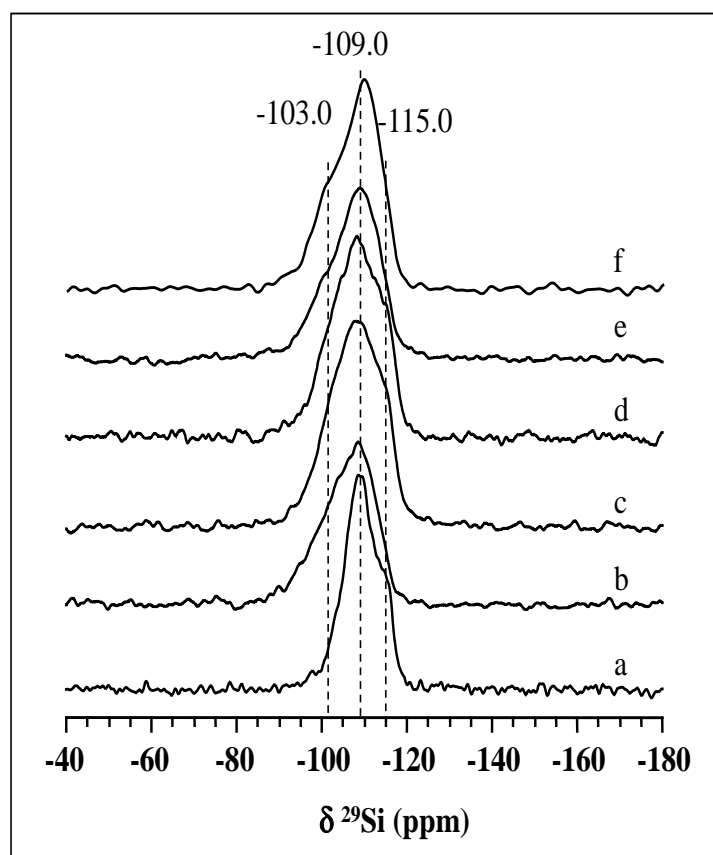

Figure S4.  $^{29}\text{Si}$  MAS NMR spectra of (a) calcined and exposed to inert atmosphere BEC-type Ge-silicate, (b) calcined BEC-type Ge-silicate exposed to  $\text{H}_2\text{O}$  vapors, (c) Ti-BEC, (d) Ti,Si-BEC, (e) calcined Ti,Si-BEC and (f) calcined Si-BEC.

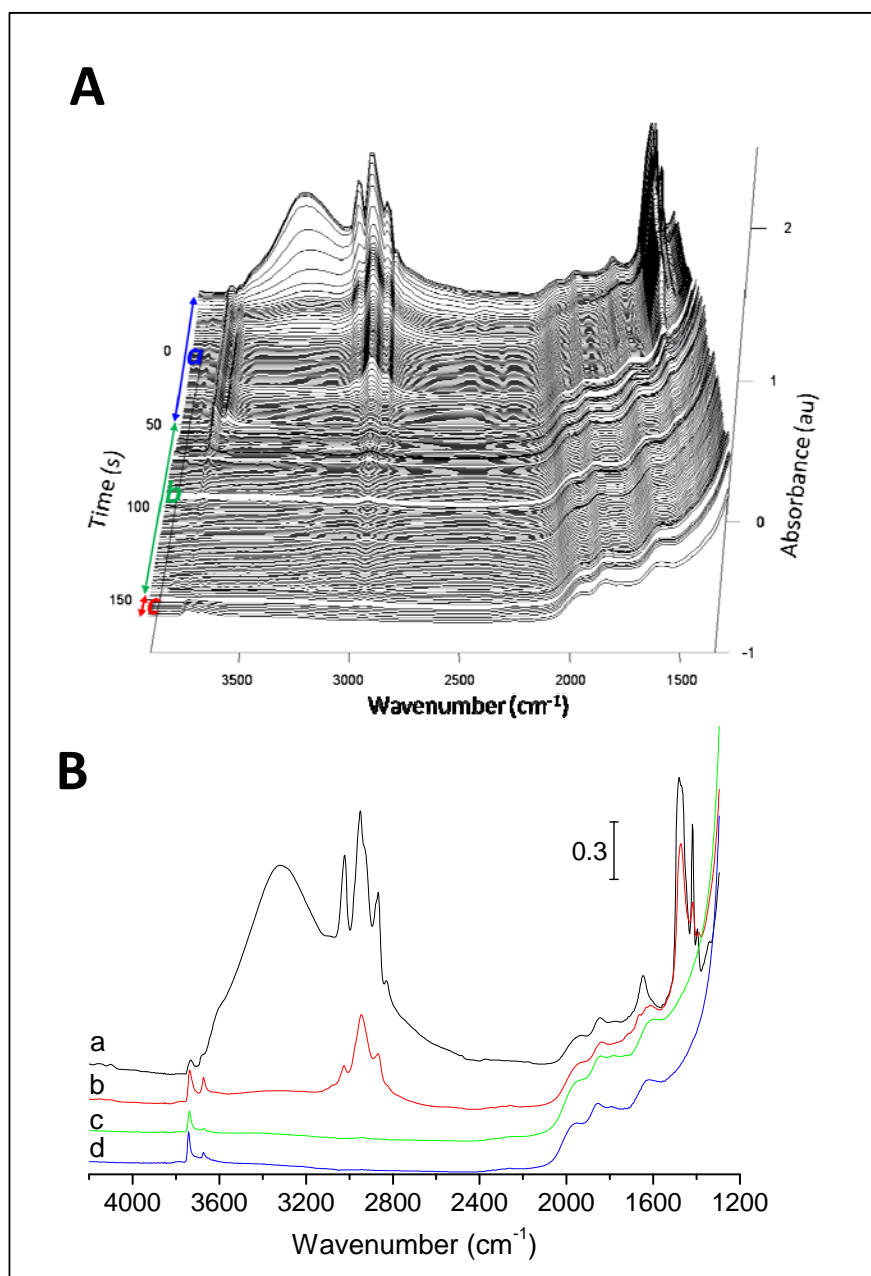

Figure S5. Post-synthesis modification of BEC-type material by method II: **(A)** Evolution of BEC-type material IR spectra vs. plasma treatment time during: O<sub>2</sub>-plasma (a), SiCl<sub>4</sub>-plasma (b) followed by O<sub>2</sub>-plasma (c) treatment. **(B)** IR spectra of BEC-type material before treatment (a), after O<sub>2</sub>-plasma (b), after O<sub>2</sub>-plasma+SiCl<sub>4</sub>-plasma (c) and after O<sub>2</sub>-plasma+SiCl<sub>4</sub>-plasma+O<sub>2</sub>-plasma (d) treatments.

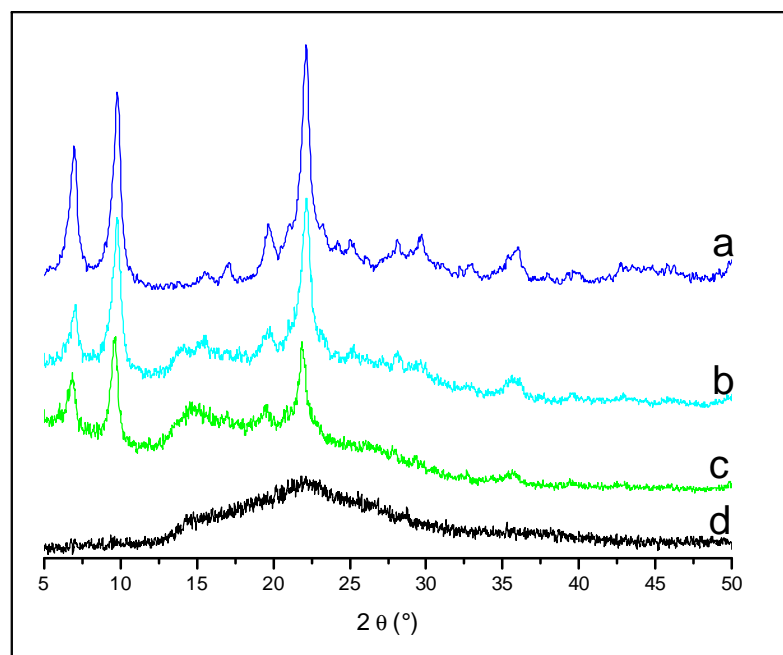

Figure S6. XRD patterns of: as-synthesized BEC-type Ge-silicate (a); calcined forms of Si-BEC (b) and Ti-BEC (c) obtained by method II; and calcined initial material exposed to water vapors (d).
